# Supplementary material for: Formation of highly ordered porphyrin adlayers induced by electrochemical potential modulation
Source: Royal Society of Chemistry journal article supplement (doi:10.1039/b512238d), 2005-12-12
Supplement: b512238d.pdf [file b512238d.pdf]

### **Experimental Details**

Au(111) single-crystal electrodes were prepared by the Clavilier method. After the electrode was annealed in a hydrogen flame and then cooled down in air for at least 3 min, adlayers of CoCTPP and CoTCPP were formed by successively immersing the electrode into a solution of either CoCTPP (*ca.* 10  $\mu\text{M}$  in benzene) for 30 s or CoTCPP (10  $\mu\text{M}$  in methanol) for 60 s. The modified Au(111) surface thus produced was then rinsed with ultrapure water, and transferred into an electrochemical STM cell, which was then filled with ultrapure 0.1 M  $\text{HClO}_4$ . Electrochemical STM measurements were performed using a Nanoscope E with a tungsten tip etched in 1 M KOH. The tips were coated with nail polish to minimize residual Faradaic currents. The STM images were recorded in constant current mode with a high-resolution scanner (HD-0.5I). The reversible hydrogen electrode (RHE) was used as the reference electrode in all experiments.
